# Supplementary material for: PD-L1 expression complements CALGB prognostic scoring system in malignant pleural mesothelioma
Source: Frontiers journal article supplement (doi:10.3389/fonc.2023.1269029), 2023-12-04
Supplement: Data_Sheet_1.PDF [file Data_Sheet_1.PDF]

## ROC curve: ROC of ROC MESO 12M OS

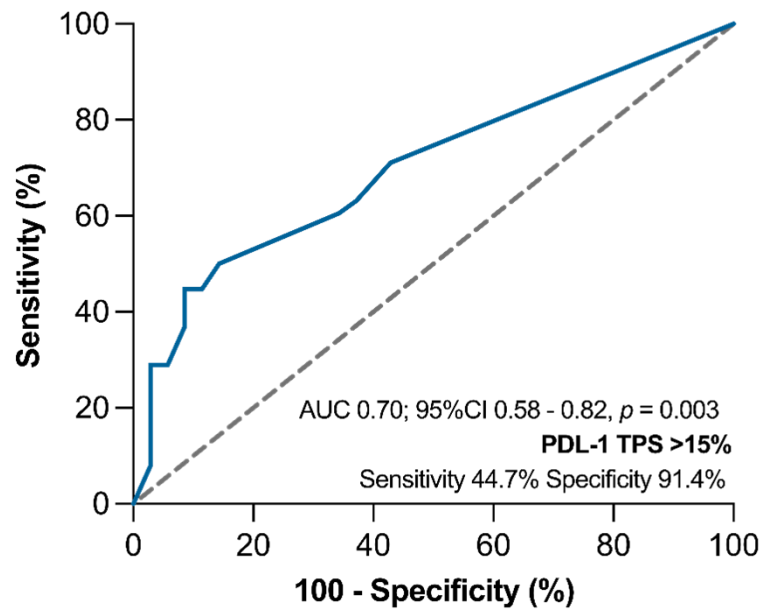

**Supplementary figure 1. ROC curve for determining high PD-L1 TPS percentage.** PD-L1, Programmed Cell Death Ligand 1. TPS, Tumor Proportion Score. AUC, Area under curve. Statistical significance was set at  $p < 0.05$ .
